# Supplementary material for: Increased migratory activity and cartilage regeneration by superficial-zone chondrocytes in enzymatically treated cartilage explants
Source: PubMed Central journal article supplement (PMC8925221; doi:10.1186/s12891-022-05210-2), 2022-03-16

## **Figure 6 Supplementary Information**

### **Title**

Increased migratory activity and cartilage regeneration by superficial zone chondrocytes  
in enzymatically treated cartilage explants

### **Authors list**

Yuichiro Shiromoto<sup>1,2</sup>, Yasuo Niki<sup>1</sup>, Toshiyuki Kikuchi<sup>3</sup>, Yasuo Yoshihara<sup>2,3</sup>, Takemi  
Oguma<sup>2</sup>, Koichi Nemoto<sup>2</sup>, Kazuhiro Chiba<sup>2</sup>, Arihiko Kanaji<sup>1</sup>, Morio Matsumoto<sup>1</sup>,  
Masaya Nakamura<sup>1</sup>

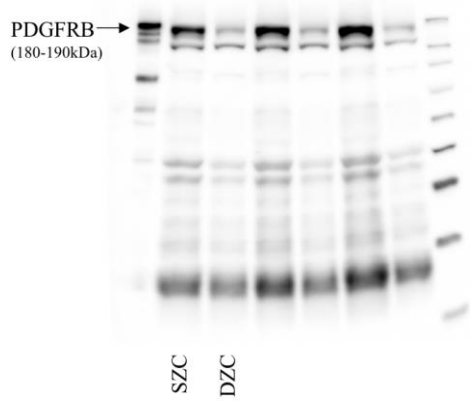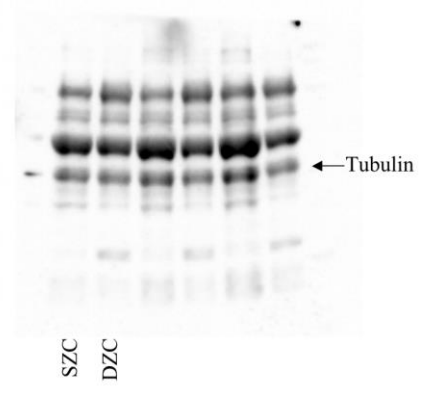

Supplement: 12891_2022_5210_MOESM1_ESM.pdf [file 12891_2022_5210_MOESM1_ESM.pdf]
